# Supplementary material for: Quantitative Decomposition of Dynamics of Mathematical Cell Models: Method and Application to Ventricular Myocyte Models
Source: PLOS journal article supplement (doi:10.1371/journal.pone.0124970), 2015-06-19
Supplement: S1 (10.1371/journal.pone.0124970.s001) [file journal.pone.0124970.s001]

## Modified $I_{K1}$ Magnesium Blockade Model

In a ventricular model by Takeuchi et al.[1], open probability of magnesium block of  $I_{K1}$  is defined with a steady-state expression as

$$f_O = \frac{\lambda}{\mu + \lambda},$$

where  $\lambda$  and  $\mu$  are rate constants depending on the membrane potential.

For analysis with taking into account effects of magnesium blockade of  $I_{K1}$ , the above equation is replaced by the following equation.

$$\frac{df_O}{dt} = \lambda(1 - f_O) - \mu f_O.$$

## References

- [1] Takeuchi A, Tatsumi S, Sarai N, Terashima K, Matsuoka S, Noma A. Ionic Mechanisms of Cardiac Cell Swelling Induced by Blocking  $\text{Na}^+/\text{K}^+$  Pump As Revealed by Experiments and Simulation. *Journal of General Physiology*. 2006 Nov;128(5):495–507.
